# Supplementary material
Source: Springer Nature journal article supplement (https://www.springermedizin.de/resource/supplementary/13012_2008_138_MOESM5_ESM.pdf/9629442)
Supplement: MOESM5 [file 9629442]

De heer J. Trietsch  
Capaciteitsgroep Huisartsgeneeskunde  
En  
De heer M.P.W. Lamberti  
Directeur CTCM

afdeling Medisch Ethische Commissie azM/UM  
uw kenmerk  
ons kenmerk MEC 06-4-033.2/pl  
doorkiesnummer 043-387 6009  
datum 24 augustus 2006  
e-mail mecsecretariaat@ctcm.azm.nl

Betreft: Effect of small group quality improvement on prescribing and test ordering performance of general practitioners. A large scale implementation study in the South of the Netherlands (MEC 06-4-033)

Geachte heren,

De Medisch Ethische Commissie heeft bovengenoemd onderzoeksvoorstel besproken in haar vergadering van 23 augustus 2006.

Opgemerkt is dat het geen onderzoek in het kader van de WMO betreft. De Medisch Ethische Commissie heeft geen bezwaar tegen de uitvoering van bovengenoemd onderzoeksvoorstel en brengt derhalve een positief advies uit.

De commissie heeft de volgende stukken in haar toetsing betrokken:

- het protocol d.d. 13-02-2006;
- de toestemmingsverklaring d.d. 03-08-2006;
- de nadere toelichting d.d. 03-08-2006.

De commissie ontvangt nog graag bericht van de start- en einddatum van genoemde studie.

Aangezien voor de uitvoering van deze studie geen gebruik wordt gemaakt van faciliteiten van het azM, is het onderzoeker toegestaan te starten met deze studie.

Met vriendelijke groet,

namens de Medisch Ethische Commissie azM/UM,



mr. R.C.W. van Gils,  
ambtelijk secretaris



dr. C.E.M. de Die-Smulders,  
voorzitter
